# Supplementary material for: Larvicidal Activities against Aedes aegypti of Supernatant and Pellet Fractions from Cultured Bacillus spp. Isolated from Amazonian Microenvironments
Source: MDPI journal article supplement (doi:10.3390/tropicalmed6020104), 2021-06-17
Supplement: s1 [file s1]

## Supplementary Material

**Table S1.** *Bacillus* strains isolated from soil and water samples from the municipalities of Parintins, Manaus and Coari, Amazonas state, Brazil. Species assignment of every queried sequence would be the desired outcome, but in many cases the limited resolution of the 16S rRNA locus precluded an exact classification at the species level. Taxonomic classification at the genus level was then assigned to the isolated strains.

| Strain  | Culture medium / Substrat | Geographic origen   | % Identity | Species GenBank acc. number                  |
|---------|---------------------------|---------------------|------------|----------------------------------------------|
| SX17    | NA/ Water                 | Dona Chagas – Mao   | 100%       | <i>Achromobacter xylosoxidans</i> MT052620   |
| SPa05   | NA/ Soil                  | Parananema - Pin    | 100%       | <i>Achromobacter xylosoxidans</i> MT052658   |
| Apr10   | ISP2/ Water               | Parananema - Pin    | 100%       | <i>Bacillus</i> sp MT052598                  |
| SUF02   | NA/ Soil                  | UFAM. C – Mao       | 100%       | <i>Bacillus</i> sp MT052654                  |
| SX07    | LB/ Water                 | Dona Chagas – Mao   | 100%       | <i>Bacillus</i> sp MT052650                  |
| SPO7    | LB/ Water                 | Portela farm – Mao  | 100%       | <i>Bacillus</i> sp MT052638.1                |
| SP1     | LB/ Soil                  | Parananema - Pin    | 100%       | <i>Bacillus</i> sp MT052642                  |
| SP6     | LB/ Soil                  | Parananema - Pin    | 100%       | <i>Bacillus</i> sp MT052653                  |
| SBC1    | LB/ Soil                  | Science Grove – Mao | 100%       | <i>Bacillus</i> sp MT052667                  |
| SX05    | NA/ Water                 | Dona Chagas – Mao   | 100%       | <i>Bacillus</i> sp MT052644                  |
| SX01    | NA/ Water                 | Dona Chagas – Mao   | 100%       | <i>Bacillus</i> sp MT052646                  |
| SX02    | NA/ Water                 | Dona Chagas – Mao   | 100%       | <i>Bacillus</i> sp MT052611                  |
| SP8     | NA/ Soil                  | Parananema - Pin    | 100%       | <i>Bacillus</i> sp MT052659                  |
| SBC11   | ISP2/ Soil                | Science Grove – Mao | 100%       | <i>Bacillus</i> sp MT052660                  |
| SPO9    | NA/ Water                 | Portela farm – Mao  | 100%       | <i>Bacillus amyloliquefaciens</i> MT052630   |
| SPa03   | NA/ Soil                  | Parananema - Pin    | 100%       | <i>Bacillus</i> sp MT052618                  |
| SX16    | NA/ Water                 | Dona Chagas – Mao   | 100%       | <i>Bacillus amyloliquefaciens</i> MT052665.1 |
| SUF06   | ISP2/ Soil                | UFAM. C – Mao       | 100%       | <i>Bacillus</i> sp MT052628                  |
| SBC3    | LB/ Soil                  | Science Grove – Mao | 100%       | <i>Bacillus</i> sp MT052613                  |
| SPa12   | LB/ Soil                  | Parananema - Pin    | 100%       | <i>Bacillus</i> sp MT052612                  |
| AMc01   | NA/ Water                 | M. River – Pin      | 100%       | <i>Bacillus</i> sp MT052656                  |
| AP01    | NA/ Water                 | Portela farm – Mao  | 100%       | <i>Bacillus megaterium</i> MT052622          |
| SX06    | NA/ Water                 | Dona Chagas – Mao   | 100%       | <i>Bacillus megaterium</i> MT052643          |
| APO3    | NA/ Water                 | Portela farm – Mao  | 100%       | <i>Bacillus</i> sp MT052623                  |
| SPa08   | NA/ Soil                  | Parananema - Pin    | 100%       | <i>Bacillus</i> sp MT052610                  |
| SMP1.1  | ISP2/ Soil                | Macurany - Pin      | 100%       | <i>Bacillus</i> sp MT052614                  |
| LFP1    | NA/ Water                 | Fr. Pond – Pin      | 100%       | <i>Bacillus</i> sp MT052619                  |
| SPO10   | LB/ Water                 | Portela farm – Mao  | 100%       | <i>Bacillus</i> sp MT052600                  |
| SMP1.2  | ISP2/ Soil                | Macurany - Pin      | 100%       | <i>Bacillus</i> sp MT052635                  |
| SX13    | LB/ Water                 | Dona Chagas – Mao   | 100%       | <i>Bacillus</i> sp MT052640                  |
| SPa01   | LB/ Soil                  | Parananema - Pin    | 100%       | <i>Bacillus</i> sp MT052617                  |
| SUF.04  | LB/ Soil                  | UFAM. C – Mao       | 100%       | <i>Bacillus</i> sp MT052616                  |
| SUF05.1 | LB/ Soil                  | UFAM. C – Mao       | 100%       | <i>Bacillus</i> sp MT052664                  |
| SUF01   | NA/ Soil                  | UFAM. C – Mao       | 100%       | <i>Bacillus</i> sp MT052657                  |
| LFP3    | ISP2/ Water               | Fr. Pond – Pin      | 100%       | <i>Bacillus</i> sp MT052655                  |
| SX10    | ISP2/ Water               | Dona Chagas – Mao   | 100%       | <i>Bacillus</i> sp MT052663                  |
| SPa14   | ISP2/ Soil                | Parananema - Pin    | 100%       | <i>Bacillus</i> sp MT052651                  |
| SBC9    | ISP2/ Soil                | Science Grove – Mao | 100%       | <i>Bacillus</i> sp MT052662                  |
| SBC10   | ISP2/ Soil                | Science Grove – Mao | 100%       | <i>Bacillus</i> sp MT052628                  |
| SBC12   | NA/ Soil                  | Science Grove – Mao | 100%       | <i>Bacillus pumilus</i> MT052606             |
| SPO2    | LB/ Water                 | Portela farm – Mao  | 100%       | <i>Bacillus safensis</i> MT052609            |
| SX15    | LB/ Water                 | Dona Chagas – Mao   | 100%       | <i>Bacillus safensis</i> MT163316            |
| SPO11   | LB/ Water                 | Portela farm – Mao  | 100%       | <i>Bacillus safensis</i> MT052625            |

|                      |             |                     |      |                                            |
|----------------------|-------------|---------------------|------|--------------------------------------------|
| SPa22                | LB/ Soil    | Parananema - Pin    | 100% | <i>Bacillus safensis</i> MT052639          |
| SPa02                | LB/ Water   | Portela farm – Mao  | 100% | <i>Bacillus</i> sp MT052621                |
| SBC2                 | LB/ Soil    | Science Grove – Mao | 100% | <i>Bacillus subtilis</i> MT052632          |
| LFP2                 | LB/ Water   | Fr. Pond – Pin      | 100% | <i>Bacillus subtilis</i> MT052629          |
| SPa10                | NA/ Soil    | Parananema - Pin    | 100% | <i>Bacillus</i> sp MT052631                |
| SC15.10              | ISP2/ Soil  | Science Grove – Mao | 100% | <i>Bacillus subtilis</i> MT052615          |
| SP12                 | ISP2/ Soil  | Parananema - Pin    | 100% | <i>Bacillu</i> sp MT052603                 |
| SP06                 | LB/ Soil    | Parananema - Pin    | 100% | <i>Bacillus</i> sp MT052669                |
| SBC13                | NA/ Soil    | Science Grove – Mao | 100% | <i>Bacillus</i> sp MT052634                |
| SC15.7               | NA/ Soil    | H15. INPA – Mao     | 100% | <i>Bacillus</i> sp MT052605                |
| SX04                 | NA/ Water   | Dona Chagas – Mao   | 100% | <i>Bacillus</i> sp MT052645                |
| GD02.13              | NA/ Water   | Gordo Farm - Coa    | 100% | <i>Bacillus</i> sp MT163315                |
| SPa09                | NA/ Soil    | Parananema - Pin    | 100% | <i>Bacillus</i> sp MT052636                |
| SMP1.3               | ISP2/ Soil  | Macurany - Pin      | 100% | <i>Bacillus</i> sp MT052648.1              |
| SX08                 | LB/ Water   | Dona Chagas – Mao   | 100% | <i>Bacillus velezensis</i> MT052649        |
| SUF05                | LB/ Soil    | UFAM. C – Mao       | 100% | <i>Bacillus</i> sp MT052624                |
| APR1.2               | NA/ Soil    | Pa. Stream – Pin    | 100% | <i>Bacillus velezensis</i> MT052627        |
| APR1.1               | NA/ Soil    | Pa. Stream – Pin    | 100% | <i>Bacillus velezensis</i> MT052626        |
| SPO5                 | LB/ Water   | Portela farm – Mao  | 100% | <i>Bacillus</i> sp MT052608                |
| SX13.1               | LB/ Water   | Dona Chagas – Mao   | 100% | <i>Bacillus</i> sp MT052668                |
| Ara5                 | NA/ Water   | Aerial Stream - Pin | 100% | <i>Bacillus</i> sp MT052601                |
| SPa06                | NA/ Soil    | Parananema - Pin    | 100% | <i>Bacillus</i> sp MT052607                |
| SPO13                | ISP2/ Water | Portela farm – Mao  | 100% | <i>Bacillus</i> sp MT052652                |
| Apr14                | ISP2/ Water | Parananema - Pin    | 100% | <i>Bacillus</i> sp MT052595                |
| Apr6                 | ISP2/ Water | Parananema - Pin    | 100% | <i>Bacillus</i> sp MT052596                |
| SP1                  | ISP2/ Soil  | Parananema - Pin    | 100% | <i>Bacillus</i> sp MT052602                |
| AMc06                | ISP2/ Water | M. River – Pin      | 100% | <i>Bacillus zhangzhouensis</i> MT052666    |
| SX17.1               | NA/ Water   | Dona Chagas – Mao   | 100% | <i>Bacillus zhangzhouensis</i> MT052641    |
| SPO                  | ISP2/ Water | Portela farm – Mao  | 100% | <i>Bacillus zhangzhouensis</i> MT052661    |
| SPa07                | NA/ Soil    | Parananema - Pin    | 100% | <i>Brevibacillus halotolerans</i> MT052647 |
| SPa04                | NA/ Soil    | Parananema - Pin    | 100% | <i>Brevibacillus halotolerans</i> MT052633 |
| SPa13                | LB/ Soil    | Parananema - Pin    | 100% | <i>Brevundimonas olei</i> MT052637         |
| Apr8                 | ISP2/ Water | Pa. Stream – Pin    | 100% | <i>Klebsiella</i> sp MT052599              |
| Apr9                 | ISP2/ Water | Pa. Stream – Pin    | 100% | <i>Serratia</i> sp MT052597                |
| 77 Bacterian strains |             |                     |      |                                            |

The sequence identities were 100% similar to the NCBI Genbank sequences and Ribosomal Database Project (RDP-II).

Pin=Parintins, Mao=Manaus and Coa=Coari; UFAM. C – Mao=UFAM Campus I – Mao; M. River – Pin=Macurany River – Pin; Fr. Pond – Pin=Francesa Pond – Pin; H15. INPA – Mao=House 15 INPA – Mao; Pa. Stream – Pin=Parananema. Stream – Pin.

**Table S2. (A-D)** - LC<sub>50</sub> and LC<sub>90</sub> values of microbial cultures larvicidal activity against *Aedes aegypti* larvae. LC<sub>50</sub> and LC<sub>90</sub> were assessed by Probit, with  $p \leq 0,05$  [31], using the statistical software Polo Plus 1.0 (LeOra Software, CA. USA) [32]. Lethal concentrations and confidence interval (CI 95%) were analyzed by the Lilliefors normality test (K samples), analysis of variance (ANOVA), multiple comparison Tukey test ( $p \leq 0,05$ ) and Student's t test with the software BioEstat 5.3 for Windows [33].

**Table S2. A** - Supernatant (SUP) fractions.

| Strain | LC <sub>50</sub> (CI 95%) | LC <sub>90</sub> (CI 95%) | X <sup>2</sup> | DF | Slope (±SE) |
|--------|---------------------------|---------------------------|----------------|----|-------------|
|--------|---------------------------|---------------------------|----------------|----|-------------|

24 h

|           |                         |                         |        |   |                |
|-----------|-------------------------|-------------------------|--------|---|----------------|
| Bti BR101 | 0.009 (0.002 – 0.013) a | 0.048 (0.027 – 0.813) a | 5.4296 | 2 | 1.719 (±0.171) |
| SX15      | 0.006 (0.001 – 0.010) a | 0.068 (0.037 – 0.855) a | 9.0326 | 3 | 1.252 (±0.146) |
| SPa07     | 0.007 (0.002 – 0.010) a | 0.056 (0.031 – 0.901) a | 10.497 | 3 | 1.418 (±0.157) |
| 48 h      |                         |                         |        |   |                |
| Bti BR101 | 0.008 (0.006 – 0.010) a | 0.029 (0.022 – 0.053) a | 6.7637 | 3 | 2.347 (±0.200) |
| SX15      | 0.006 (0.001 – 0.010) a | 0.068 (0.037 – 0.855) a | 9.0326 | 3 | 1.252 (±0.146) |
| SPa07     | 0.006 (0.002 – 0.009) a | 0.020 (0.015 – 0.059) a | 18.495 | 3 | 2.599 (±0.216) |
| 72 h      |                         |                         |        |   |                |
| Bti BR101 | 0.004 (0.001 – 0.007) a | 0.004 (0.001 – 0.007) a | 7.4621 | 3 | 2.748 (±0.365) |
| SX15      | 0.005 (0.001 – 0.007) a | 0.005 (0.001 – 0.007) a | 6.7782 | 3 | 2.864 (±0.389) |
| SPa07     | 0.004 (0.001 – 0.007) a | 0.004 (0.001 – 0.007) a | 8.0917 | 3 | 2.687 (±0.355) |

LC Lethal Concentration; CI = Confidence Interval;  $\chi^2$  = chi-square; DF = Degrees of freedom; SE = Standard Error.  
Same letters, a, b, c, etc do not differ at the 5% probability level ( $p > 0.05$ ).

**Table S2. B - Non-autoclaved Pellet (PEL) fractions.**

| Strain    | LC <sub>50</sub> (CI 95%) | LC <sub>90</sub> (CI 95%) | X <sup>2</sup> | DF | Slope (±SE)    |
|-----------|---------------------------|---------------------------|----------------|----|----------------|
| 24 h      |                           |                           |                |    |                |
| Bti BR101 | 0.008 (0.004 – 0.011) bc  | 0.058 (0.033 – 0.391) a   | 6.5449         | 3  | 1.500(±0.180)  |
| SPa09     | 0.006 (0.001 – 0.009) c   | 0.089 (0.089 – 3.192) a   | 6.4172         | 3  | 1.072 (±0.152) |
| SPa22     | 0.013 (0.010 – 0.016) ab  | 0.113 (0.064 – 0.405) a   | 9.2917         | 4  | 1.369 (±0.127) |
| GD02.13   | 0.006 (0.002 – 0.009) c   | 0.148 (0.068 – 1.428) a   | 6.2864         | 4  | 2.391 (±0.340) |
| SP06      | 0.009 (0.006 – 0.012) bc  | 0.083 (0.050 – 0.266) a   | 9.3171         | 4  | 1.358 (±0.130) |
| SBC13     | 0.007 (0.004 – 0.009) c   | 0.009 (0.044 – 0.192) a   | 11.998         | 5  | 1.289 (±0.125) |
| SPa07     | 0.009 (0.004 – 0.013) bc  | 0.124 (0.0060 – 1.097) a  | 10.931         | 4  | 1.130 (±0.126) |
| SX15      | 0.010 (0.006 – 0.013) bc  | 0.088 (0.056 – 0.231) a   | 3.7187         | 3  | 1.348 (±0.125) |
| BC1       | -                         | -                         | -              | -  | -              |
| 48 h      |                           |                           |                |    |                |
| Bti BR101 | 0.008 (0.007 – 0.009) a   | 0.023 (0.021 – 0.027) a   | 1.988          | 2  | 2.716 (±0.225) |
| SPa09     | 0.006 (0.002 – 0.009) ab  | 0.026 (0.019 – 0.055) a   | 3.5529         | 2  | 2.049 (±0.185) |
| SPa22     | 0.004 (0.001 – 0.007) ab  | 0.023 (0.018 – 0.042) a   | 7.2396         | 3  | 1.762 (±0.185) |

|           |                          |                          |        |   |                |
|-----------|--------------------------|--------------------------|--------|---|----------------|
| GD02.13   | 0.005 (0.001 – 0.008) ab | 0.017 (0.012 – 0.03) a   | 12.748 | 3 | 2.260 (±0.225) |
| SP06      | 0.007 (0.002 – 0.010) ab | 0.029 (0.029 – 0.091) a  | 5.3146 | 2 | 2.052 (±0.175) |
| SBC13     | 0.004 (0.001 – 0.006) b  | 0.019 (0.015 – 0.026) a  | 4.8732 | 3 | 1.871 (±0.201) |
| SPa07     | 0.005 (0.001 – 0.008) ab | 0.021 (0.016 – 0.0875) a | 12.227 | 3 | 2.122 (±0.227) |
| SX15      | 0.005 (0.001 – 0.008) ab | 0.022 (0.016 – 0.084) a  | 12.227 | 3 | 2.061 (±0.225) |
| BC1       | -                        | -                        | -      | - | -              |
| 72 h      |                          |                          |        |   |                |
| Bti BR101 | 0.003 (0.000 – 0.006) a  | 0.012 (0.009 – 0.016) a  | 30.173 | 6 | 2.337 (±0.284) |
| SPa09     | 0.005 (0.001 – 0.007) a  | 0.015 (0.012 – 0.021) a  | 8.4219 | 3 | 2.595 9±0.260) |
| SPa22     | 0.005 (0.001 – 0.007) a  | 0.015 (0.012 – 0.021) a  | 8.4219 | 3 | 2.595 (±0.260) |
| GD02.13   | 0.003 (0.000 – 0.005) a  | 0.012 (0.009 – 0.016) a  | 16.803 | 5 | 1.916 (±0.235) |
| SP06      | 0.007 (0.002 – 0.009) a  | 0.018 (0.014 – 0.046) a  | 6.0876 | 2 | 3.099 (±0.288) |
| SBC13     | 0.005 (0.003 – 0.006) a  | 0.012 (0.010 – 0.013) a  | 0.557  | 1 | 3.234 (±0.529) |
| SPa07     | -                        | -                        | -      | - | -              |
| SX15      | -                        | -                        | -      | - | -              |
| BC1       | 0.023 (0.021 – 0.027) a  | 0.256 (0.159 – 0.535) a  | 2.458  | 3 | 1.234 (±0.137) |

LC Lethal Concentration; CI = Confidence Interval;  $\chi^2$  = chi-square; DF = Degrees of freedom; SE = Standard Error.  
Same letters, a,b,c, etc do not differ at the 5% probability level ( $p > 0.05$ ).

**Table S2. C - Autoclaved pellet (APEL) fractions.**

| Strain | LC <sub>50</sub> (CI 95%) | LC <sub>90</sub> (CI 95%) | X <sup>2</sup> | DF | Slope (±SE)    |
|--------|---------------------------|---------------------------|----------------|----|----------------|
| 24h    |                           |                           |                |    |                |
| SPa22  | 0.009 (0.003 – 0.013) a   | 0.073 (0.040 – 0.670) a   | 9.8656         | 3  | 1.389 (±0.145) |
| 48h    |                           |                           |                |    |                |
| SPa22  | 0.006 (0.001 – 0.010) a   | 0.025 (0.017 – 0.106) a   | 6.7376         | 2  | 2.130 (±0.187) |
| 72h    |                           |                           |                |    |                |
| SPa22  | 0.007 (0.004 – 0.009) a   | 0.018 (0.014 – 0.034) a   | 63.089         | 6  | 3.313 (±0.232) |

LC Lethal Concentration; CI = Confidence Interval;  $\chi^2$  = chi-square; DF = Degrees of freedom; SE = Standard Error.  
Different letters differ at the 5% probability level ( $p > 0.05$ ).

**Table S2. D - Mixed autoclaved pellet plus supernatant (APEL+SUP) fractions.**

| Strain | LC <sub>50</sub> (CI 95%) | LC <sub>90</sub> (CI 95%) | X <sup>2</sup> | DF | Slope (±SE) |
|--------|---------------------------|---------------------------|----------------|----|-------------|
|--------|---------------------------|---------------------------|----------------|----|-------------|

|           |                         |                         |        |   |                |
|-----------|-------------------------|-------------------------|--------|---|----------------|
| 24h       |                         |                         |        |   |                |
| Bti BR101 | 0.005 (0.002 – 0.008) a | 0.037 (0.027 – 0.078) a | 5.3019 | 3 | 1.495 (±0.160) |
| SPa22     | 0.007 (0.002 – 0.010) a | 0.031 (0.021 – 0.115) a | 33.418 | 3 | 2.030 (±0.155) |
| SP06      | 0.008 (0.004 – 0.011) a | 0.046 (0.030 – 0.122) a | 8.1382 | 3 | 1.680 (±0.143) |
| 48h       |                         |                         |        |   |                |
| Bti BR101 | 0.005 (0.001 – 0.008) a | 0.018 (0.013 – 0.039) a | 28.230 | 4 | 2.252 (±0.204) |
| SPa22     | 0.007 (0.004 – 0.009) a | 0.018 (0.014 – 0.032) a | 59.140 | 6 | 3.337 (±0.234) |
| SP06      | 0.006 (0.002 – 0.009) a | 0.023 (0.017 – 0.074) a | 12.453 | 3 | 2.252 (±0.204) |
| 72h       |                         |                         |        |   |                |
| Bti BR101 | 0.004 (0.000 – 0.006) a | 0.011 (0.010 – 0.015) a | 16.042 | 5 | 2.607 (±0.367) |
| SPa22     | 0.003 (0.000 – 0.006) a | 0.012 (0.009 – 0.016) a | 17.313 | 5 | 2.607 (±0.367) |
| SP06      | 0.003 (0.000 – 0.005) a | 0.016 (0.013 – 0.040) a | 26.194 | 6 | 1.776 (±0.239) |

LC Lethal Concentration; CI = Confidence Interval;  $\chi^2$  = chi-square; DF = Degrees of freedom; SE = Standard Error.  
Different letters differ at the 5% probability level ( $p > 0.05$ ).
